# Supplementary material for: Three-dimensional multilevel porous thin graphite nanosuperstructures for Ni(OH)2-based energy storage devices
Source: Royal Society of Chemistry journal article supplement (doi:10.1039/c4ta02617a), 2014-01-01
Supplement: c4ta02617a1.pdf [file c4ta02617a1.pdf]

## Supporting Information

### **Three-Dimensional Multilevel Porous Thin Graphite Nanosuperstructures for Ni(OH)<sub>2</sub>-based Energy Storage Devices**

*Jing Ning<sup>1,3‡</sup>, Xiaobin Xu<sup>1‡</sup>, Chao Liu<sup>1</sup> and D. L. Fan<sup>1,2\*</sup>*

1. Materials Science and Engineering Program, Texas Materials Institute, The University of Texas at Austin, Austin, TX 78712, USA
2. Department of Mechanical Engineering, The University of Texas at Austin, Austin, TX 78712, USA
3. School of Microelectronics, Xidian University, Xi'an, Shaanxi 710071, P. R. China

Correspondence can be addressed to: [dfan@austin.utexas.edu](mailto:dfan@austin.utexas.edu)

<sup>‡</sup>equal contribution

#### **Measurements and calculations of the specific surface area:**

The volumetric specific surface areas of Ni foam and porous Cu-Ni foam were characterized by multi-point BET Surface Area Analysis (Pacific Surface Science Inc.) The volume specific surface areas of Ni foam and porous Cu-Ni were determined as 0.0532 m<sup>2</sup>/cm<sup>3</sup> and 0.096 m<sup>2</sup>/cm<sup>3</sup>, respectively.

Then, the volumetric specific surface area of non-porous graphite and porous graphite can be estimated from Ni foam and porous Cu-Ni foam, respectively. Considering the Ni or Cu-Ni etching process resulted double sided (inner/outer) graphite, the volume specific surface area of porous and non-porous graphite became 0.192 m<sup>2</sup>/cm<sup>3</sup> and 0.103 m<sup>2</sup>/cm<sup>3</sup>, respectively.

Of the same volume of 1 cm × 1 cm × 0.02 cm, the masses of porous and non-porous graphite/Ni(OH)<sub>2</sub> were measured as 0.2 mg and 0.5 mg, respectively. As a result, the specific surface area normalized by weight could be estimated as 19.2 m<sup>2</sup>/g for porous graphite/Ni(OH)<sub>2</sub>, and 4.12 m<sup>2</sup>/g for non-porous one graphite/Ni(OH)<sub>2</sub>. Note that the estimations shown above didn't take account of the surface area contribution from Ni(OH)<sub>2</sub> for either porous or non-

porous graphite/Ni(OH)<sub>2</sub>.

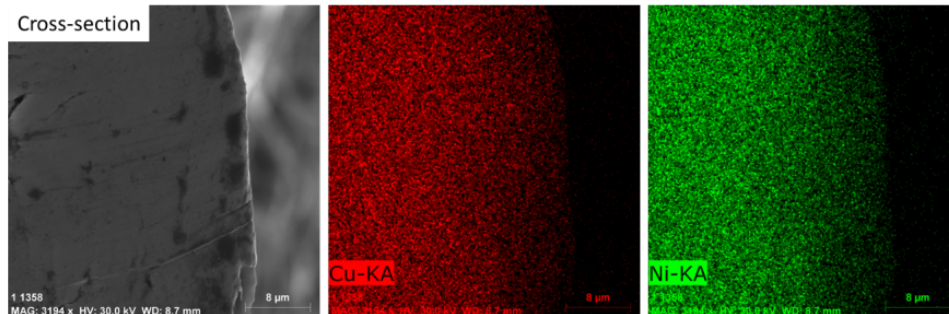

**Figure S1.** SEM image and EDS mappings of the cross-section of Cu-Ni foam after annealing at 1000° C.

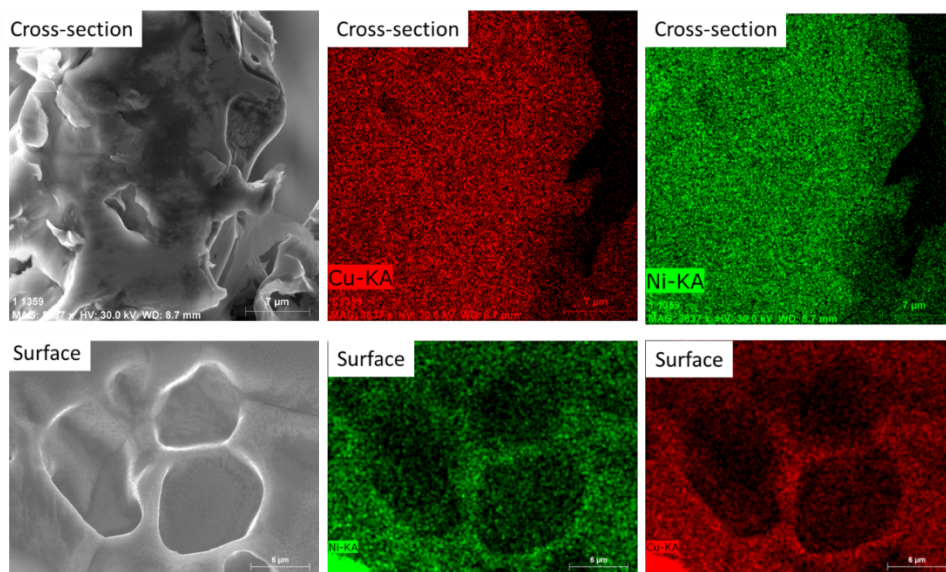

**Figure S2.** SEM images and EDS mappings of the cross-sections and surfaces of porous Cu-Ni catalysts after electrochemical etching.

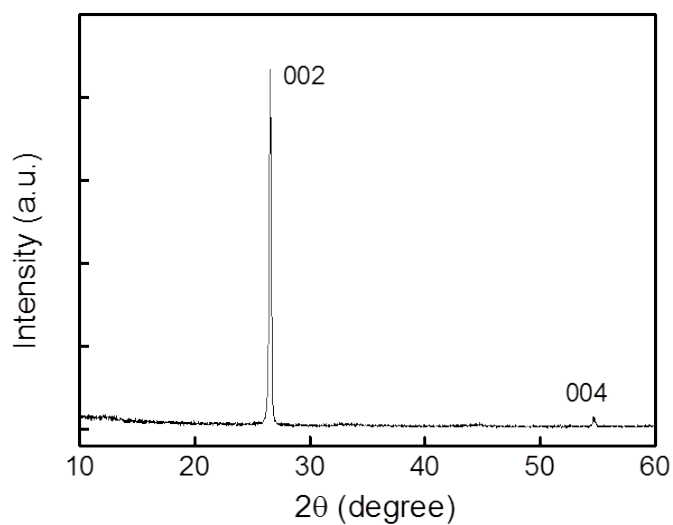

**Figure S3.** XRD measurement of the freestanding multi-level porous graphite.

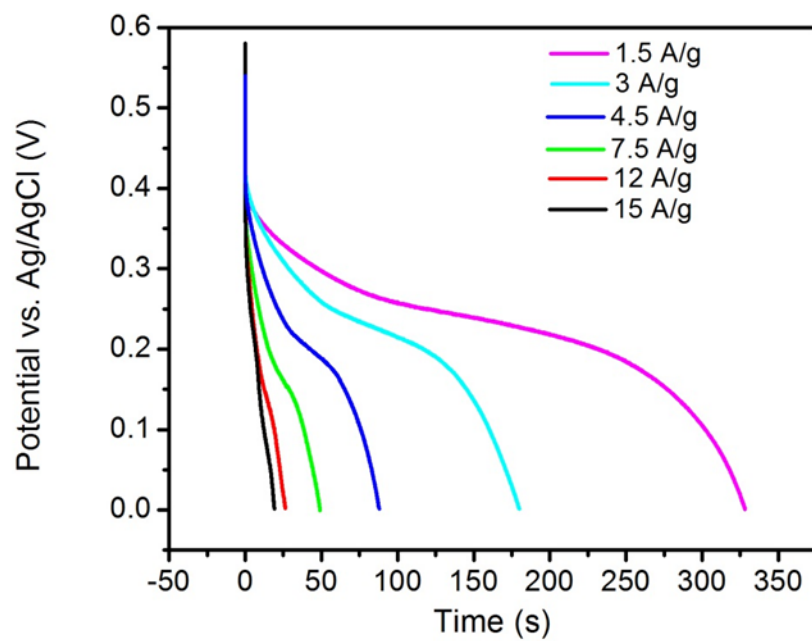

**Figure S4.** galvanostatic discharging curves of Ni(OH)<sub>2</sub> on the porous 3-D graphite.

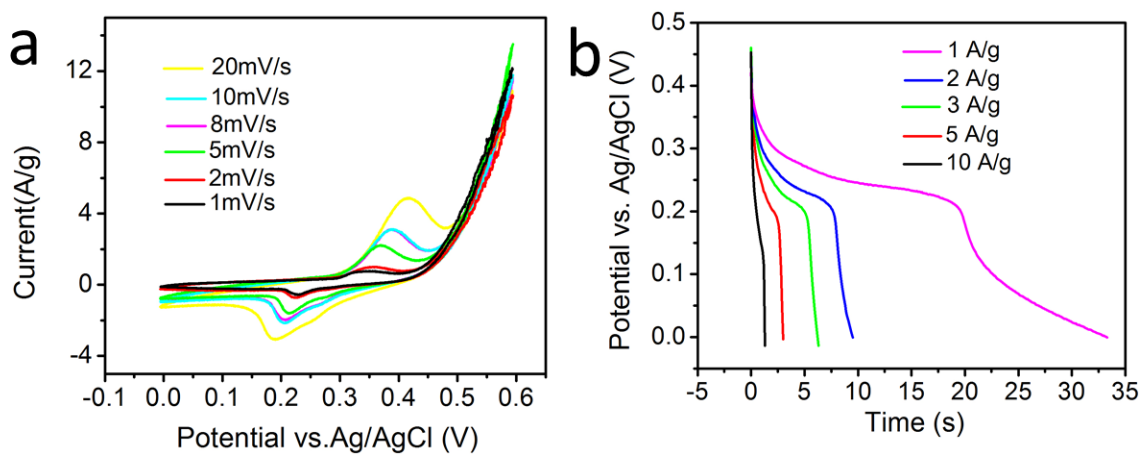

**Figure S5.** (a, b) Cyclic voltammogram and galvanostatic discharging curves of Ni(OH)<sub>2</sub> on the non-porous 3-D graphite.

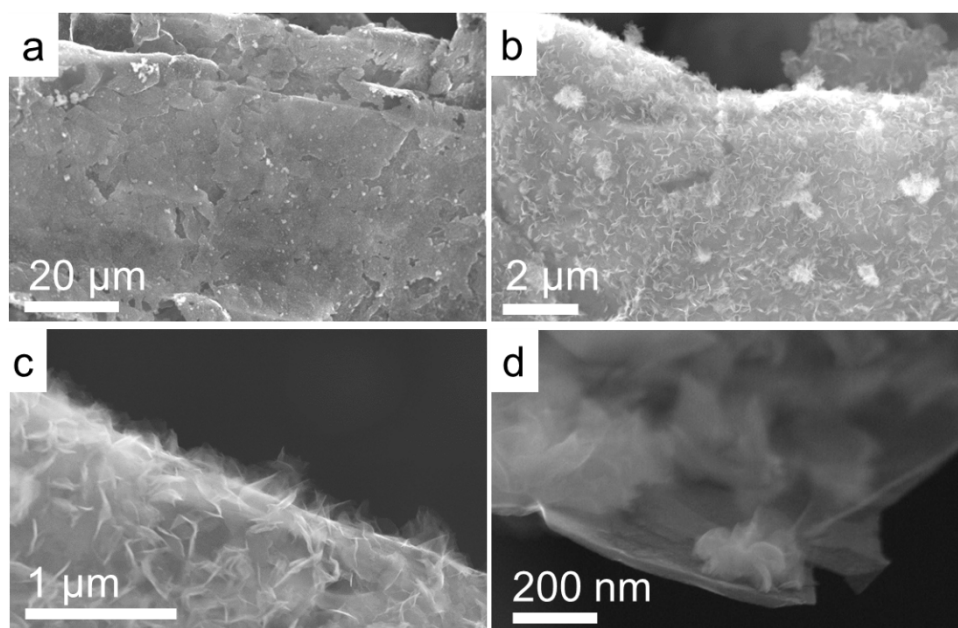

**Figure S6.** SEM images of Ni(OH)<sub>2</sub> nanostructures on the non-porous 3-D graphite.

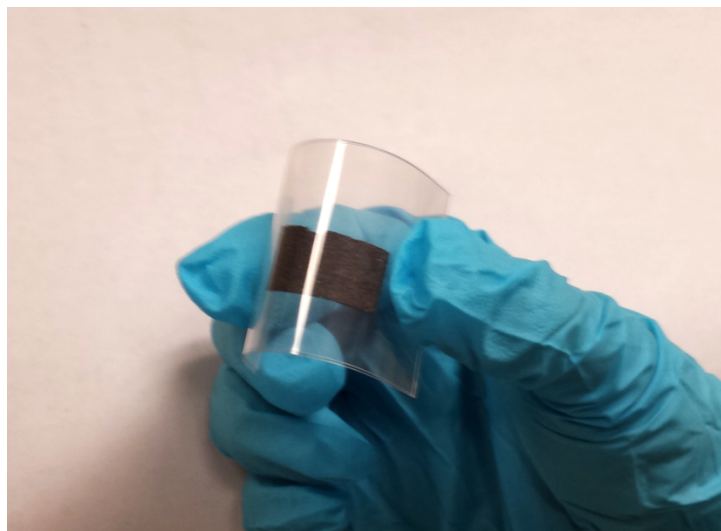

**Figure S7.** Photo of flexible porous graphite/Ni(OH)<sub>2</sub>.

**Table S1.** Summary of electrochemical measurements in recent Ni(OH)<sub>2</sub> energy storage devices

| Year              | Materials                              | Additives                          | Supporting Materials and testing conditions     | Specific capacitance: Ni(OH) <sub>2</sub> /*with graphene/**total electrode (current density /scan rate) | Cyclic performance                                      | Specific capacity (calculated from the provided data): Ni(OH) <sub>2</sub> /*with graphene/**total electrode (mAh/g) (Discharging rate ) |
|-------------------|----------------------------------------|------------------------------------|-------------------------------------------------|----------------------------------------------------------------------------------------------------------|---------------------------------------------------------|------------------------------------------------------------------------------------------------------------------------------------------|
| 2014 <sup>1</sup> | Graphite Ni(OH) <sub>2</sub> nanosheet | HPMC-10 wt%                        | Ni Foam<br>6 M KOH<br>0–1V<br>(Hg/HgO)          | 1956 F/g<br>* N/A<br>** ~49F/g<br>(1 A/g)                                                                | 70%<br>1000 cycles<br>(10 A/g)                          | ~278<br>*N/A<br>** N/A<br>(1 A/g)                                                                                                        |
| 2013 <sup>2</sup> | graphite Ni(OH) <sub>2</sub> Film      | N/A                                | Ni Foam<br>6 M KOH<br>0–0.5 V<br>(Ag/AgCl)      | ~1560 F/g<br>*N/A<br>**~166 F/g<br>(0.5 A/g)                                                             | 65%<br>1000 cycles<br>(10 A/g)                          | ~207<br>*N/A<br>**~22<br>(1 A/g)                                                                                                         |
| 2013 <sup>3</sup> | graphite Ni(OH) <sub>2</sub> film      | AC-80wt%<br>PVDF-10wt%<br>AB-10wt% | Ni Foam<br>1 M KOH<br>0–0.5 V<br>(Ag/AgCl)      | ~2188 F/g<br>*N/A<br>** ~16F/g<br>(1 mV/s)                                                               | 97%<br>1000 cycles<br>76%<br>10000 cycles<br>(100 mV/s) | N/A<br>*N/A<br>**N/A                                                                                                                     |
| 2013 <sup>4</sup> | GrapheneNi(OH) <sub>2</sub> flim       | PTFE-60wt% hydrogel                | Platinum foil<br>6 M KOH<br>0–0.5V<br>(Ag/AgCl) | N/A<br>*1327F/g<br>**N/A<br>(2A/g )                                                                      | ~95%<br>2000 cycles<br>(16 A/g)                         | ~ N/A<br>*~156<br>**N/A<br>(2 A/g)                                                                                                       |
| 2012 <sup>5</sup> | graphite Ni(OH) <sub>2</sub> film      | AM-75%<br>PTFE-5%<br>AB-20%        | Ni Foam<br>6 M KOH<br>0–0.5V<br>(Hg/HgO)        | 1735F/g<br>* N/A<br>** ~43 F/g<br>(1 mV/s)                                                               | N/A                                                     | N/A<br>*N/A<br>**N/A                                                                                                                     |
| 2012 <sup>6</sup> | graphite Ni(OH) <sub>2</sub> nanosheet | AM-75%<br>PTFE-5%<br>AB-20%        | Ni Foam<br>6 M KOH<br>-0.1–0.45V<br>(SCE)       | 2194 F/g<br>* N/A<br>** 55 F/g<br>(2 mV/s)                                                               | 95.7%<br>2000 cycles<br>(100 mV/s)                      | N/A<br>*N/A<br>**N/A                                                                                                                     |
| 2011 <sup>7</sup> | Ni foam Ni(OH) <sub>2</sub> nanowoall  | No additive                        | Ni Foam<br>1 M NaOH<br>0–0.55V<br>(SCE)         | 2675F/g<br>* No<br>graphite<br>**~7 F/g<br>(5mV/cm <sup>2</sup> )                                        | >96%<br>500 cycles<br>(30mV/cm <sup>2</sup> )           | N/A<br>*No graphite<br>**~24<br>(5mV/cm <sup>2</sup> )                                                                                   |

|                   |                                                      |             |                                                   |                                                              |                                    |                                         |
|-------------------|------------------------------------------------------|-------------|---------------------------------------------------|--------------------------------------------------------------|------------------------------------|-----------------------------------------|
| 2010 <sup>8</sup> | graphene<br>Ni(OH) <sub>2</sub><br>nanosheet         | PTFE-1%     | Ni Foam<br>3% KOH<br>0–0.5 V<br>(Ag/AgCl)         | 1335 F/g<br>*~935 F/g<br>** ~33F/g<br>(2.8 A/g)              | ~100%<br>2000 cycles<br>(28.6 A/g) | ~250<br>*~170<br>** N/A<br>(2.8 A/g)    |
| 2008 <sup>9</sup> | Ni foam<br>Ni(OH) <sub>2</sub><br>nanosheet          | No additive | Ni Foam<br>1 M NaOH<br>-0.05–0.55V<br>(SCE)       | 3125 F/g<br>* No<br>graphite<br>**~39 F/g<br>(4 A/g)         | ~48%<br>300 cycles<br>(4 A/g)      | ~444<br>*No graphite<br>**~6<br>(4 A/g) |
| <b>This work</b>  | Porous<br>graphite<br>/ Ni(OH) <sub>2</sub><br>sheet | No additive | Self supported<br>1 M KOH<br>0–0.6 V<br>(Ag/AgCl) | 3125 F/g (2<br>mV/s)<br>*1149 F/g<br>**1149 F/g<br>(1.5 A/g) | 97.5%<br>4,000 cycles<br>(20A/g)   | 480<br>*137<br>**137<br>(1.5 A/g)       |

1. Footnotes: *Since most references didn't include the mass information of the substrates, i.e. Ni foams, Ti foils, or carbon papers. Here, we assume commercial available substrates were used. The density of commercially available 1.6 mm thick Ni foams and 0.1 mm Ti foils are ~40 mg/cm<sup>2</sup> and ~45 mg/cm<sup>2</sup>, respectively. All the parameters in the table have been given on the base of the three-electrode systems.*

*(PTFE: poly(tetrafluoroethylene); AM: active materials; AB: acetylene black or carbon black; PVDF: polyvinylidene difluoride.)*

- Zhang, J. T.; Liu, S.; Pan, G. L.; Li, G. R.; Gao, X. P. *Journal of Materials Chemistry A* **2014**, *2*, 1524–1529.
- Ji, J. Y.; Zhang, L. L.; Ji, H. X.; Li, Y.; Zhao, X.; Bai, X.; Fan, X. B.; Zhang, F. B.; Ruoff, R. S. *Acs Nano* **2013**, *7*, (7), 6237-6243.
- Li, H. B.; Yu, M. H.; Wang, F. X.; Liu, P.; Liang, Y.; Xiao, J.; Wang, C. X.; Tong, Y. X.; Yang, G. W. *Nat Commun* **2013**, *4*.
- Xu, Y. X.; Huang, X. Q.; Lin, Z. Y.; Zhong, X.; Huang, Y.; Duan, X. F. *Nano Res* **2013**, *6*, (1), 65-76.
- Yan, J.; Fan, Z. J.; Sun, W.; Ning, G. Q.; Wei, T.; Zhang, Q.; Zhang, R. F.; Zhi, L. J.; Wei, F. *Adv Funct Mater* **2012**, *22*, (12), 2632-2641.
- Yan, J.; Sun, W.; Wei, T.; Zhang, Q.; Fan, Z. J.; Wei, F. *J Mater Chem* **2012**, *22*, (23), 11494-11502.
- Lu, Z. Y.; Chang, Z.; Zhu, W.; Sun, X. M. *Chem Commun* **2011**, *47*, (34), 9651-9653.
- Wang, H. L.; Casalongue, H. S.; Liang, Y. Y.; Dai, H. J. *J Am Chem Soc* **2010**, *132*, (21), 7472-7477.
- Yang, G. W.; Xu, C. L.; Li, H. L. *Chem Commun* **2008**, (48), 6537-6539.
